# Supplementary material for: Synthesis and characterization of a tetracationic acidic organic salt and its application in the synthesis of bis(indolyl)methanes and protection of carbonyl compounds
Source: Royal Society of Chemistry journal article supplement (doi:10.1039/c5ra01422k), 2015-01-01

## *Supporting Information*

### **Synthesis and characterization of a tetracationic acidic organic salt and its application in the synthesis of bis(indolyl)methanes and protection of carbonyl compounds**

Azim Ziyaei Halimehjani,\* Seyyed Emad Hooshmand and Elham Vali Shamiri

Faculty of Chemistry, Kharazmi University (formerly Tarbiat Moallem University), 49 Mofateh St., Tehran, Iran. Tel.: +98(21)88848949, Fax: +98(21)88820992; e-mail: ziyaei@khu.ac.ir

| <b>Content</b>                                                            | <b>Pages</b> |
|---------------------------------------------------------------------------|--------------|
| <b>Experimental</b>                                                       | <b>2-3</b>   |
| <b>Copy of <sup>1</sup>H and <sup>13</sup>C NMR for the new compounds</b> | <b>4-7</b>   |
| <b>TGA/DTG analysis for catalyst</b>                                      | <b>8</b>     |

## Experimental

**General information:** All materials were purchased from Merck and Fluka. All NMR spectra's were recorded on a Bruker AMX 300 MHz spectrometer and are referenced to the deuterated solvent used. Elemental analysis performed by a Perkin-Elmer 2004 (II) CHN analyzer. Infrared spectra were recorded in potassium bromide pellets on a Perkin Elmer FT spectrum RX1 over the range 400–4000  $\text{cm}^{-1}$  and melting points were determined with a Branstead Electrothermal 9200 apparatus. TGA measurement has been performed by a NETZSCH TG 209 F1 Iris instrument. The measurement has been performed under a flow of nitrogen and the sample (ca. 5.90 mg) was scanned between room temperature and 600 °C.

**Synthesis of 1,1'-(propane-1,3-diyl)bis(1,4-diazabicyclo[2.2.2]octan-1-ium) dibromide (compound 3):** A solution of DABCO (4.62 g, 40 mmol) and 1,3-dibromopropane (3.45 g, 15 mmol) in methanol (50 mL) was left stirring for 20h at rt. The reaction mixture was then evaporated in vacuo to give a yellowish residue which was triturated with warm acetone (30 mL, two times) to provide a white precipitate. Finally, the precipitate was collected by filtration and dried under vacuum. White solid; yield: (97%);  $^1\text{H}$  NMR (300 MHz,  $\text{D}_2\text{O}$ ):  $\delta$  (ppm) 2.56 (2H, m), 3.13 (12H, t,  $J=7.3\text{Hz}$ ), 3.27 (4H, t,  $J=8.7\text{Hz}$ ), 3.37 (12H, t,  $J=7.9\text{Hz}$ );  $^{13}\text{C}$  NMR (75 MHz,  $\text{D}_2\text{O}$ ): 15.2, 44.0, 52.3, 60.3; Anal. Calcd. (%) for  $\text{C}_{15}\text{H}_{30}\text{Br}_2\text{N}_4$ : C, 42.27; H, 7.09; N, 13.14 Found: C, 42.07; H, 6.73; N, 12.89.

**Synthesis of 4,4'-(propane-1,3-diyl)bis(1-methyl-1,4-diaza bicyclo[2.2.2]octane-1,4-diium) dibromide diiodide (compound 4):** Compound a (20 mmol) and  $\text{CH}_3\text{I}$  (60 mmol) were mixed and stirred at room temperature for 6 h. Then the reaction mixture was filtered off and washed several times with ethyl acetate to remove any remained  $\text{CH}_3\text{I}$ . The products were collected and dried under vacuum. Colorless solid; yield: (99%);  $^1\text{H}$  NMR (300 MHz,  $\text{D}_2\text{O}$ ):  $\delta$  (ppm) 2.48 (2H, m), 3.32 (6H, s), 3.68 (4H, t,  $J$ : 8.4Hz), 4.03 (24H, s);  $^{13}\text{C}$  NMR (75 MHz,  $\text{D}_2\text{O}$ ): 16.5, 51.7, 52.1, 53.1, 60.5; Anal. Calcd. (%) for  $\text{C}_{17}\text{H}_{36}\text{Br}_2\text{I}_2\text{N}_4$ : C, 28.75; H, 5.11; N, 7.89. Found: C, 29.18; H, 5.29; N, 7.89.

**Synthesis of 4,4'-(propane-1,3-diyl)bis(1-methyl-1,4-diaza bicyclo[2.2.2]octane-1,4-diium) tetra hydrogen sulfate (compound 5):** A solution of  $\text{H}_2\text{SO}_4$  (20 mmol) in  $\text{CH}_2\text{Cl}_2$  (5 mL) was added dropwise to a suspension of compound 4 (5 mmol) in 5 mL  $\text{CH}_2\text{Cl}_2$ , and the reaction mixture was stirred at 0 °C for 10 min. Then, the resulting reaction mixture was refluxed for 20 h. After completion of the reaction, solvent was removed by evaporation

under reduced pressure and the residue was washed several times with ethyl acetate to give the pure tetracationic acidic organic salt **5**. Colorless solid; yield: (93%);  $^1\text{H}$  NMR (300 MHz,  $\text{D}_2\text{O}$ ):  $\delta$  (ppm) 2.51 (2H, m), 3.37 (6H, s), 3.71 (4H, m), 4.08 (24H, s);  $^{13}\text{C}$  NMR (75 MHz,  $\text{D}_2\text{O}$ )  $\delta$  (ppm) 15.9, 51.4, 52.4, 53.1, 60.5; Anal. Calcd. (%) for  $\text{C}_{17}\text{H}_{40}\text{N}_4\text{O}_{16}\text{S}_4$ : C, 29.82; H, 5.89; N, 8.18; Found: C, 29.88; H, 5.89; N, 8.12.

**General procedure for preparation of bis(indolyl)methanes in water catalyzed by tetra cationic acidic organic salt (TCAOS):** In a 25 mL round bottom flask equipped with magnetic stir bar were added an indole (2.0 mmol), an aldehyde and water (5 mL). To this mixture the catalyst [TCAOS(0.04 mmol, 0.03 g)] was added and the mixture was stirred at room temperature for 2h. Progress of reaction was monitored by TLC (3:7, ethyl acetate–petroleum ether). After completion of the reaction, the product was extracted with diethyl ether (3\*15) and the combined organic phases were dried with anhydrous  $\text{Na}_2\text{SO}_4$  and evaporated under reduced pressure to give the crude product which was purified via recrystallization in hexane, or ethanol-water mixture. **3-((2-chlorophenyl)(2-methyl-1*H*-indol-3-yl)methyl)-2-methyl-1*H*-indole:** m.p. 220-221 °C;  $^1\text{H}$  NMR (300 MHz,  $\text{CDCl}_3$ )  $\delta$  (ppm) 2.04 (6H, s), 6.21 (1H, s), 6.85-7.37 (12H, m), 7.73 (2H, brs);  $^{13}\text{C}$  NMR (300 MHz,  $\text{CDCl}_3$ )  $\delta$  (ppm) 11.8, 36.9, 109.5, 111.5, 118.5, 118.7, 120.2, 126.0, 127.1, 128.5, 129.0, 130.5, 131.5, 134.1, 134.5, 140.9; Anal. Calcd. (%) for  $\text{C}_{25}\text{H}_{21}\text{ClN}_2$ : C, 78.01; H, 5.50; N, 7.28. Found: C, 78.21; H, 5.30; N, 7.32.

**General procedure for acetalization of aldehydes in the presence of TCAOS:** In a test tube equipped with a magnetic stir bar, aldehyde (1 mmol), a diol (1.1 mmol) and TCAOS (4 mol%) was added and the mixture was heated at 80 °C for 3h. progress of reaction was monitored by TLC. After completion, ethyl acetate (10 mL) and water (10 mL) were added to the reaction mixture. The organic phase was separated and dried with  $\text{Na}_2\text{SO}_4$  and finally evaporated to give the corresponding product.

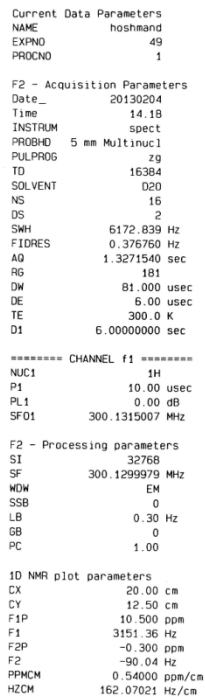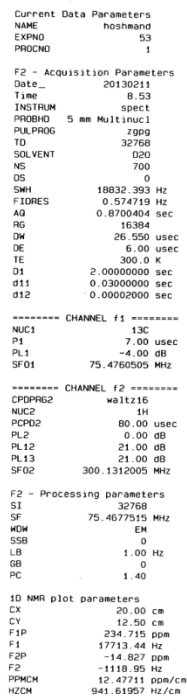

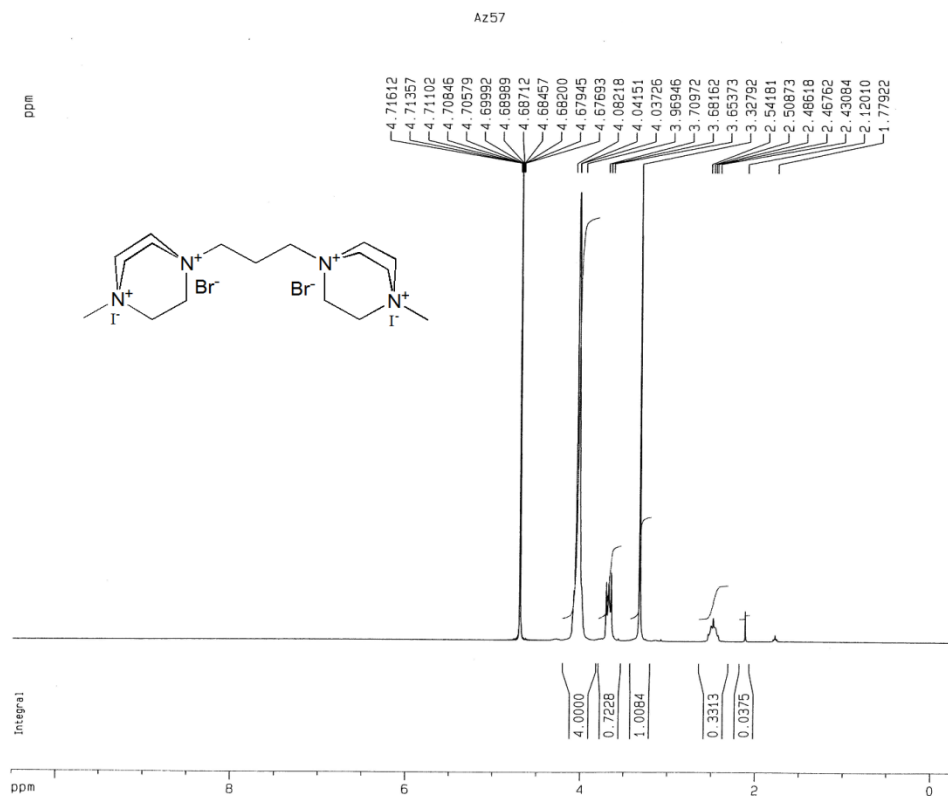

Current Data Parameters  
NAME hoshmand  
EXPNO 56  
PROCNO 1

F2 - Acquisition Parameters  
Date\_ 20130219  
Time 13.07  
INSTRUM spect  
PROBHD 5 mm Multinuc1  
PULPROG zg  
TD 16384  
SOLVENT D2O  
NS 8  
DS 2  
SWH 6172.839 Hz  
FIDRES 0.376760 Hz  
AQ 1.3271540 sec  
RG 267.4  
DW 61.000 usec  
DE 6.00 usec  
TE 300.0 K  
D1 6.00000000 sec

\*\*\*\*\* CHANNEL f1 \*\*\*\*\*  
NUC1 1H  
P1 10.00 usec  
PL1 0.00 dB  
SF01 300.1315007 MHz

F2 - Processing parameters  
SI 32768  
SF 300.1299992 MHz  
WDW EM  
SSB 0  
LB 0.30 Hz  
GB 0  
PC 1.00

1D NMR plot parameters  
CX 20.00 cm  
CY 12.50 cm  
F1P 10.500 ppm  
F1 3151.36 Hz  
F2P -0.300 ppm  
F2 0.04 Hz  
PPMCM 0.54000 ppm/cm  
HZCM 162.07021 Hz/cm

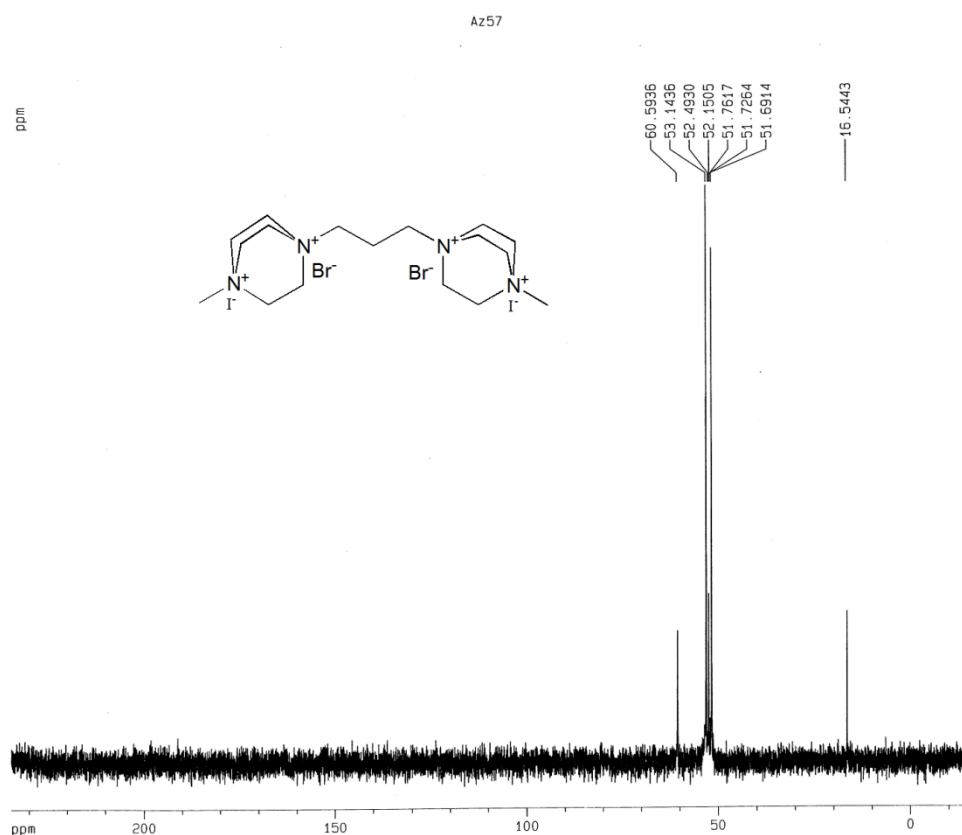

Current Data Parameters  
NAME hoshmand  
EXPNO 57  
PROCNO 1

F2 - Acquisition Parameters  
Date\_ 20130220  
Time 8.34  
INSTRUM spect  
PROBHD 5 mm Multinuc1  
PULPROG zgpg30  
TD 32768  
SOLVENT D2O  
NS 2120  
DS 0  
SWH 18832.393 Hz  
FIDRES 0.574719 Hz  
AQ 0.8700404 sec  
RG 16384  
DW 26.550 usec  
DE 6.00 usec  
TE 300.0 K  
D1 2.00000000 sec  
d11 0.03000000 sec  
d12 0.00002000 sec

\*\*\*\*\* CHANNEL f1 \*\*\*\*\*  
NUC1 13C  
P1 7.00 usec  
PL1 -4.00 dB  
SF01 75.4760505 MHz

\*\*\*\*\* CHANNEL f2 \*\*\*\*\*  
CPDPRG2 waltz16  
NUC2 1H  
PCPD2 80.00 usec  
PL2 0.00 dB  
PL12 21.00 dB  
PL13 21.00 dB  
SF02 300.1312005 MHz

F2 - Processing parameters  
SI 32768  
SF 75.4677515 MHz  
WDW EM  
SSB 0  
LB 1.00 Hz  
GB 0  
PC 1.40

1D NMR plot parameters  
CX 20.00 cm  
CY 12.50 cm  
F1P 234.715 ppm  
F1 17713.44 Hz  
F2P -14.827 ppm  
F2 -1118.95 Hz  
PPMCM 12.47711 ppm/cm  
HZCM 941.61937 Hz/cm

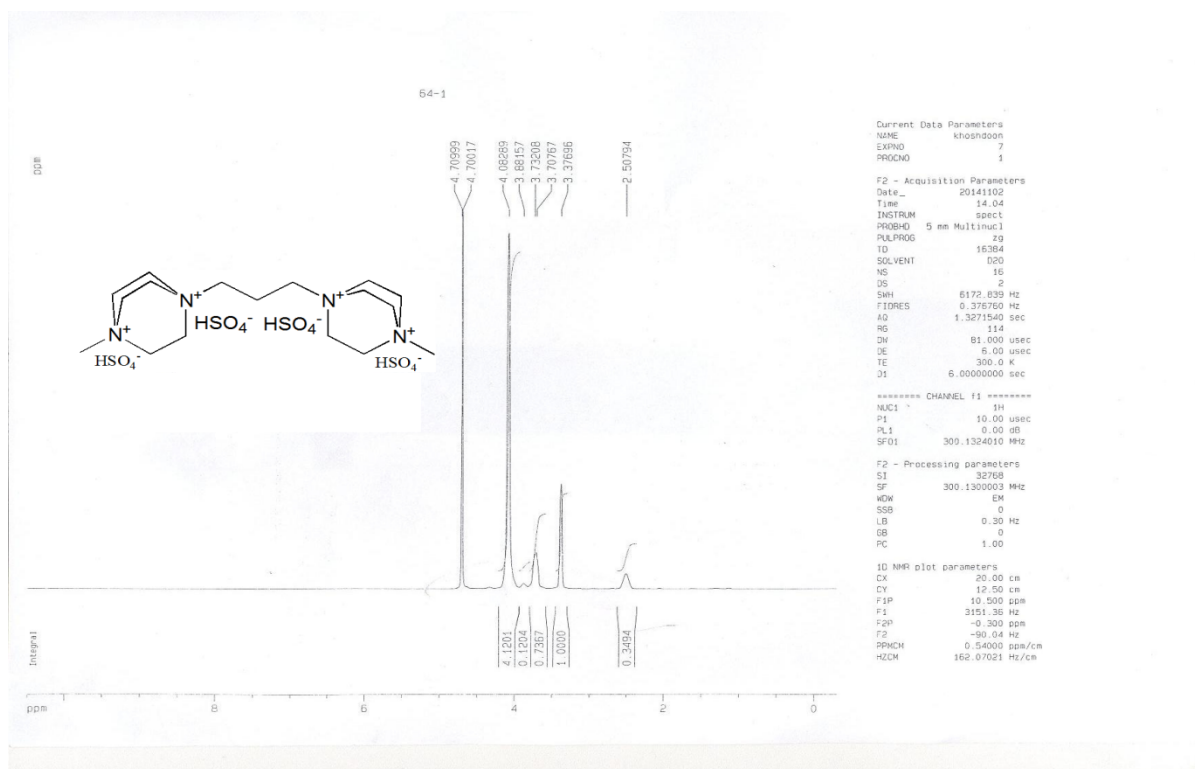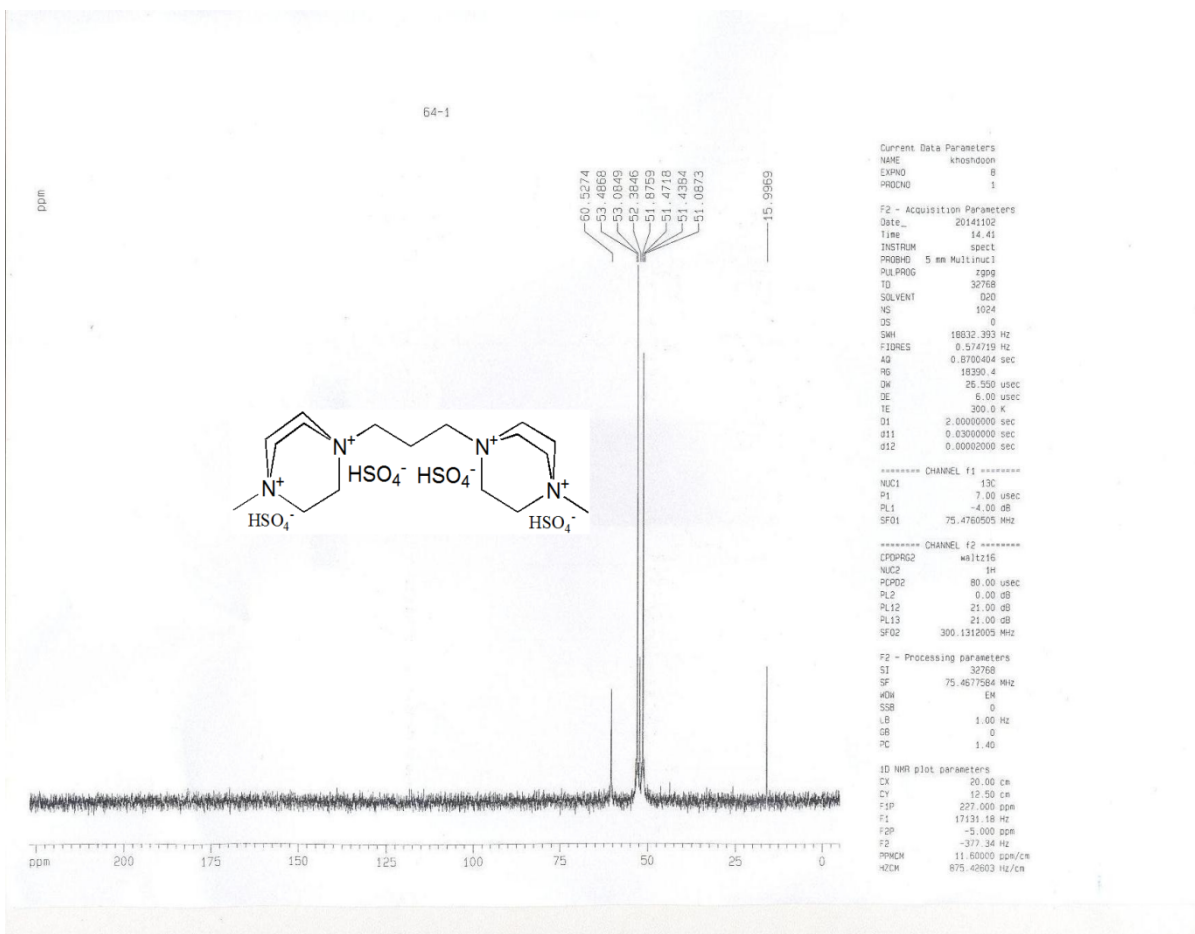

Az76F

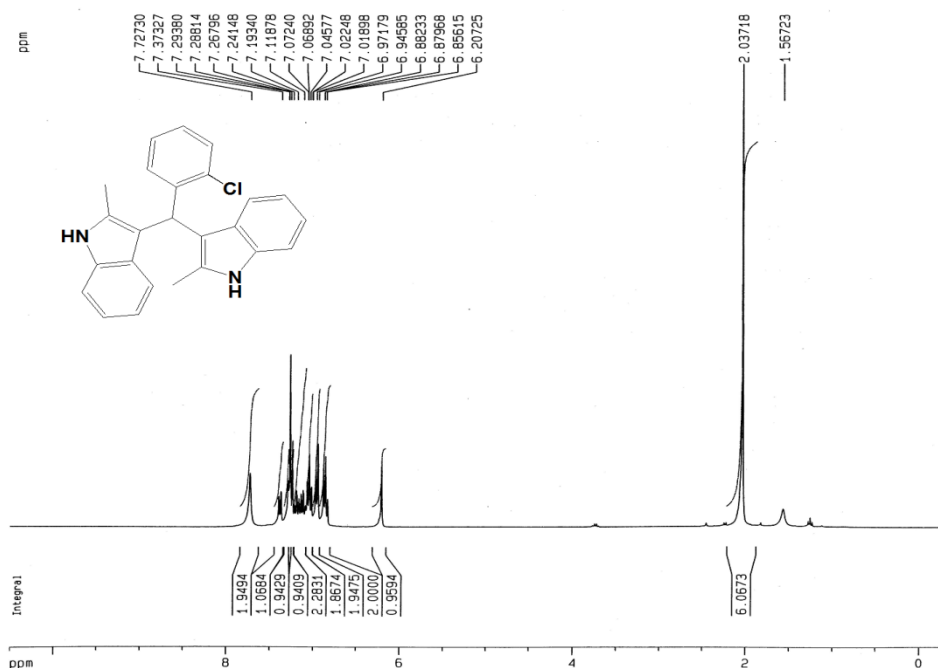

Az76F

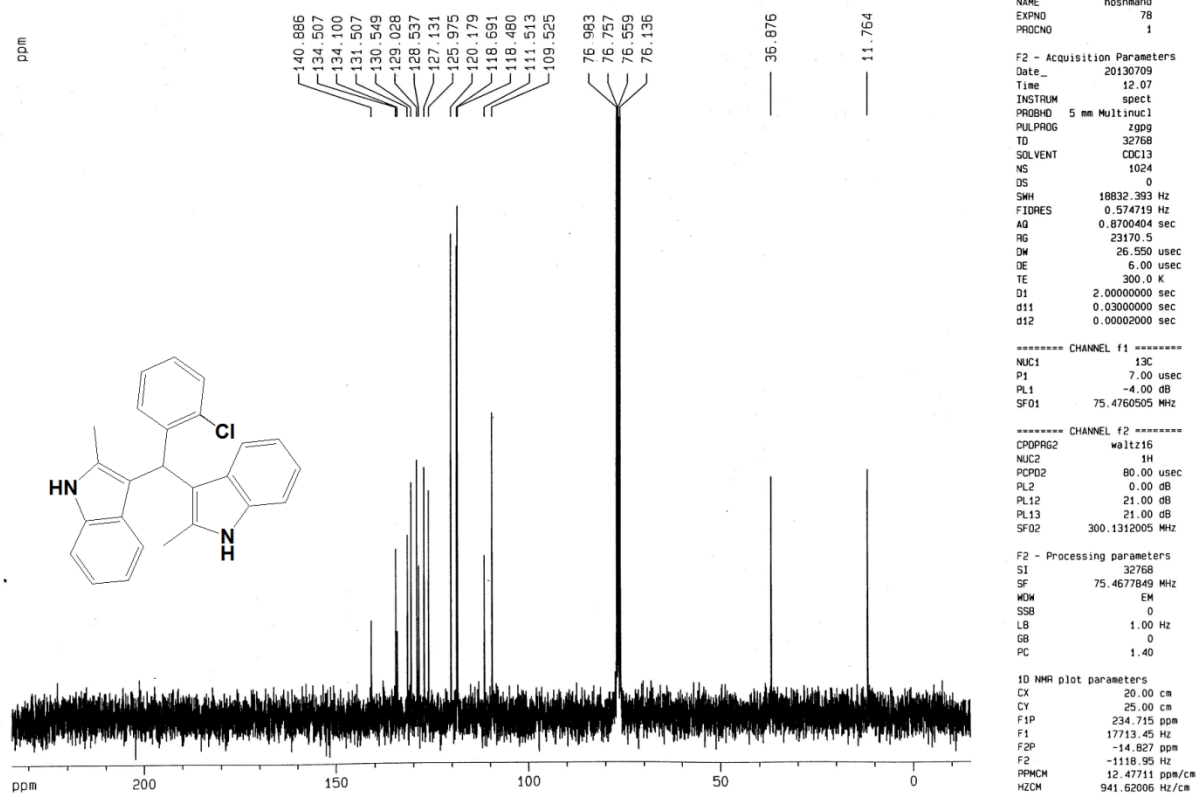

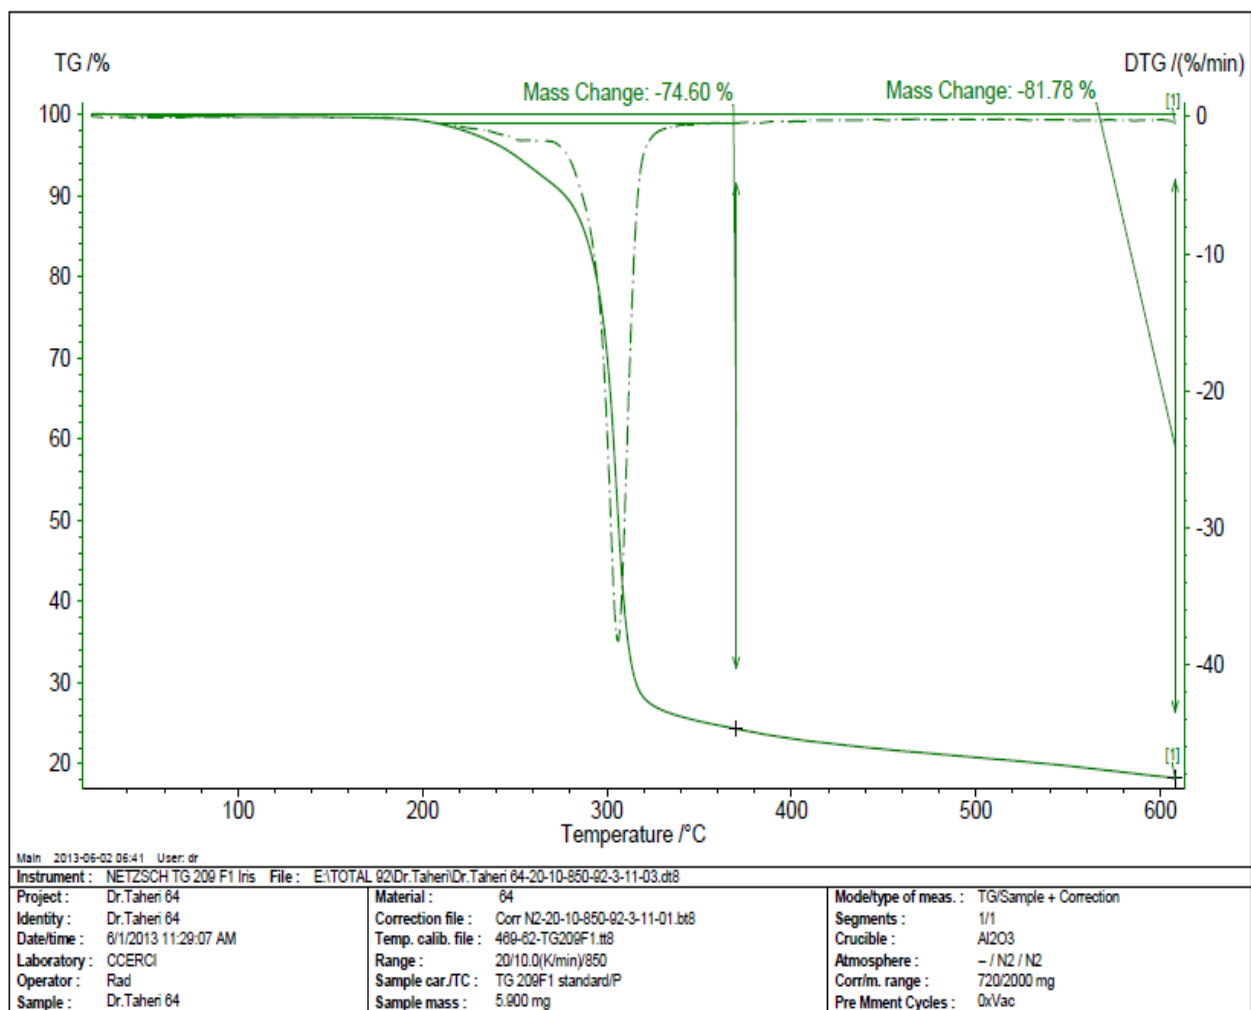

Supplement: c5ra01422k1.pdf [file c5ra01422k1.pdf]
